# Supplementary material for: Synthesis and Characterization of Polyester Based Ethylene-Vinyl Acetate Nanofiber Membrane for Water Treatment
Source: Research Square preprint supplement (doi:10.21203/rs.3.rs-7429597/v1), 2025-08-25
Supplement: Supplementary file 1 [file c4c78e0806df27c781bad2c3.docx]

**Synthesis and Characterization of Polyester Based Ethylene-Vinyl Acetate Nanofiber Membrane for Water Treatment**

**Supplementary material**

Muniza Asif1,2, Ayaz Ali Shah3*, Nabi Bakhsh Mallah4, Muhammad Ilyas Khan5, Aamir Raza3

1Department of Environmental Engineering, NED University of Engineering & Technology, Karachi, Karachi City, Sindh, Pakistan.

2Office of Research, Innovation, and Commercialization, Sir Syed University of Engineering & Technology, Karachi, Karachi City, 75300 Sindh, Pakistan.

3Department of Energy and Environment Engineering, Dawood University of Engineering & Technology, Karachi, Karachi City, Sindh, Pakistan 74800.

4Department of Technology, Faculty of Engineering Science and Technology, Hamdard University, Karachi 75210, Pakistan

5Department of Chemical Engineering, College of Engineering, King Khalid University, Abha 61413, Saudi Arabia

Correspondence: [aas@duet.edu.pk](mailto:aas@duet.edu.pk) (+92-333-2775895)

Table S1. Summary of preparation of solution for toluene for all wt.%

| **Weight %** | **Conc. Of EVA (g)** | **Conc. Of toluene (ml)** | **Stirring speed (rpm)** | **Temperature (°C)** | **Time (min.)** | **Total volume** |
| --- | --- | --- | --- | --- | --- | --- |
| 10wt% | 1.8 | 18 | 350 | 70°C | 35 | 20ml |
| 15wt% | 2.55 | 17 | 350 | 70°C | 35 | 20ml |
| 20wt% | 3.2 | 16 | 350 | 70°C | 37 | 20ml |
| 30wt% | 4.2 | 14 | 350 | 70°C | 40 | 20ml |
